# Supplementary material for: In Situ Ruminal Digestion, Fermentation Parameters, and Forage Nutritive Value of Cool-Season Baleage Ensiled under Contrasting Inoculant Strategies
Source: MDPI journal article supplement (doi:10.3390/ani12212929), 2022-10-25
Supplement: s1 [file s1]

**Table S1.** Dry matter (DM), crude protein (CP), neutral detergent fiber (NDF), acid detergent fiber (ADF) and lignin concentrations of wheat and clover (WC) mixture (Study 1) ensiled for 120-d.

| Days after ensiling | DM                 | NDF  | ADF  | ADL  | CP   |
|---------------------|--------------------|------|------|------|------|
|                     | ----- % -----      |      |      |      |      |
| 0                   | 20.9a <sup>§</sup> | 51.7 | 30.3 | 5.5  | 15.4 |
| 7                   | 20.6a              | 48.9 | 29.0 | 5.4  | 17.2 |
| 14                  | 19.1ab             | 49.6 | 29.5 | 5.4  | 16.9 |
| 21                  | 20.1a              | 49.5 | 29.5 | 5.6  | 17   |
| 28                  | 18.4ab             | 48.5 | 29.2 | 4.9  | 19.1 |
| 45                  | 16.9b              | 47.7 | 29.9 | 5.7  | 17   |
| 60                  | 18.6ab             | 50.1 | 30.6 | 4.0  | 16.2 |
| 120                 | 10.3c              | 53.2 | 33.8 | 6.5  | 18.1 |
| SEM <sup>‡</sup>    | 0.95               | 0.04 | 1.08 | 0.68 | 1.07 |

<sup>‡</sup> Standard error of the mean. <sup>§</sup>Means followed by same letter in the column do not differ ( $P \leq 0.05$ ).

**Table S2.** Dry matter (DM), crude protein (CP), neutral detergent fiber (NDF), acid detergent fiber (ADF) and lignin concentrations of wheat and brassica hybrid (WB) mixture (Study 2) ensiled for 120-d.

| Days after ensiling | DM            | NDF  | ADF  | ADL   | CP                 |
|---------------------|---------------|------|------|-------|--------------------|
|                     | ----- % ----- |      |      |       |                    |
| 0                   | 24.2          | 49.5 | 28.3 | 4.8   | 12.2a <sup>§</sup> |
| 7                   | 22.9          | 52.8 | 29.8 | 4.9   | 13.4ab             |
| 14                  | 22.7          | 51.8 | 29.0 | 4.9   | 13ab               |
| 21                  | 22.1          | 54.1 | 30.3 | 5     | 13.3bc             |
| 28                  | 22.5          | 49.1 | 28.3 | 4.5   | 13.9ab             |
| 45                  | 22.5          | 51.2 | 29.6 | 4.7   | 13.7ab             |
| 60                  | 21.5          | 49.9 | 28.9 | 4.7   | 13.8bc             |
| 120                 | 20.3          | 54.2 | 32.1 | 5.2   | 14.2c              |
| SEM <sup>‡</sup>    | 0.73          | 2.45 | 1.02 | 0.198 | 0.5                |

<sup>‡</sup> Standard error of the mean. <sup>§</sup>Means followed by same letter in the column do not differ ( $P \leq 0.05$ ).
